# Supplementary material for: 3-Dimensional photonic crystal surface enhanced upconversion emission for improved near-infrared photoresponse
Source: Royal Society of Chemistry journal article supplement (doi:10.1039/c3nr04884e), 2013-10-30
Supplement: c3nr04884e.pdf [file c3nr04884e.pdf]

Supplementary information:

### 3-Dimensional Photonic Crystal Surface Enhanced Upconversion Emission for Improved Near-infrared Photoresponse

Wenbin Niu, Liap Tat Su, Rui Chen, Hu Chen, Yi Wang, Alagappan Palaniappan,  
Handong Sun and Alfred ling Yoong Tok\*

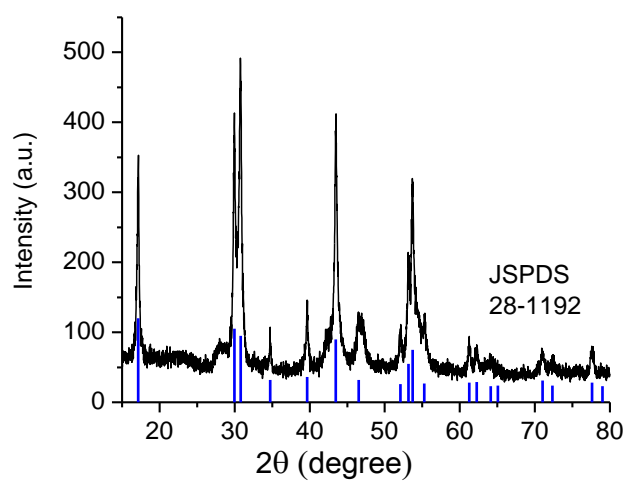

Fig. S1 XRD patterns of NaYF<sub>4</sub>:Yb/Er UCNPs

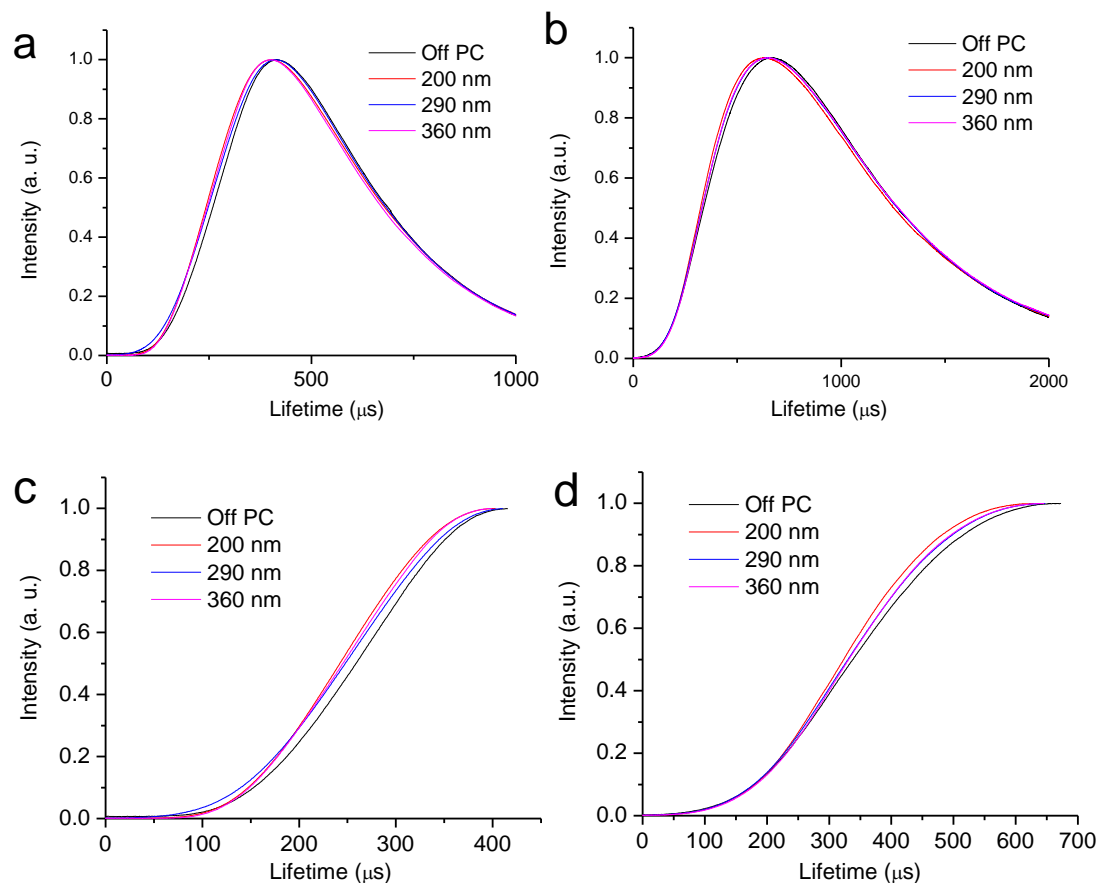

Fig.S2 Upconversion luminescence rise and decay curves monitoring the 540 nm (a) and 477 nm (b) emissions of NaYF<sub>4</sub>:Yb/Er and NaYF<sub>4</sub>:Yb/Tm UCNPs off and on 3D PCs with different polystyrene sphere sizes, respectively, and the corresponding enlarged rise curves of NaYF<sub>4</sub>:Yb/Er (c) and NaYF<sub>4</sub>:Yb/Tm UCNPs (d).

**Table S1.** Upconversion luminescence rise time monitoring the 540 nm (a) and 477 nm (b) emissions of NaYF<sub>4</sub>:Yb/Er and NaYF<sub>4</sub>:Yb/Tm UCNPs off and on 3D PCs with different polystyrene sphere sizes, respectively.

| 3D PCs with different polystyrene sphere sizes        | Without 3D PC | 200 nm | 290 nm | 360 nm |
|-------------------------------------------------------|---------------|--------|--------|--------|
| Rise times of 540 nm of NaYF <sub>4</sub> :Yb/Er (μs) | 258           | 242    | 247    | 244    |
| Rise times of 477 nm of NaYF <sub>4</sub> :Yb/Tm (μs) | 339           | 323    | 327    | 328    |

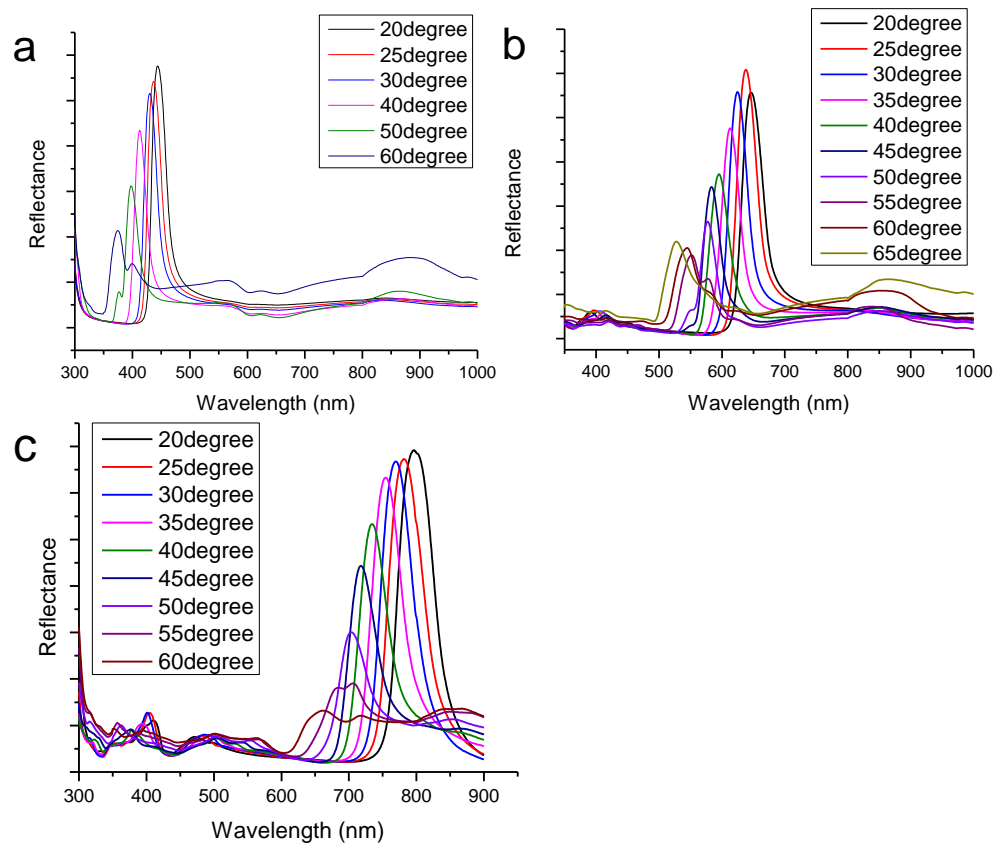

Fig. S3 Angle-dependent reflectance spectra of opal 3D photonic crystals prepared with 200 (a), 290 (b) and 360 nm (c) polystyrene spheres.

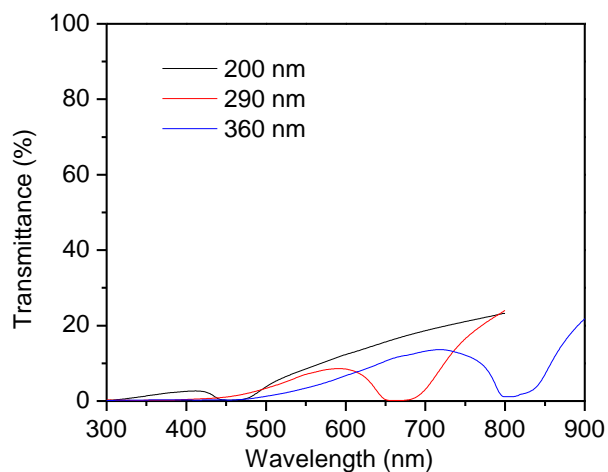

Fig. S4 Transmittance spectra of 3D PCs prepared with different polystyrene sphere sizes at 0.4 wt% concentration.

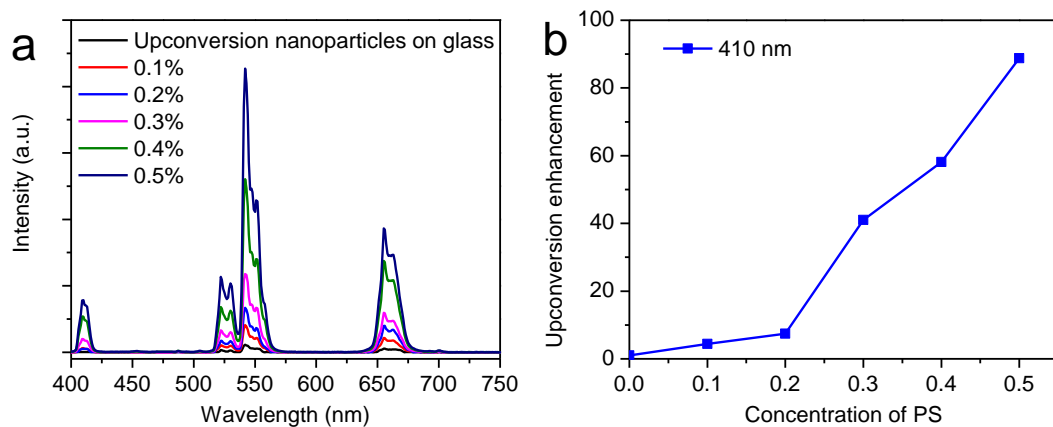

Fig. S5 Upconversion spectra (a) and enhancement factors (b) of NaYF<sub>4</sub>:Yb/Er UCNPs on the surfaces of 3D PCs prepared with different concentration of 290 nm polystyrene spheres.

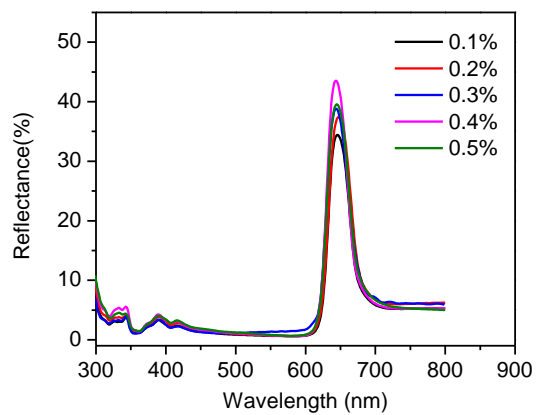

Fig. S6 Reflectance spectra of opal 3D photonic crystals prepared with various concentrations of 290 nm polystyrene spheres. The reflectance spectra were measured at 20° incidence to the normal.
